# Supplementary material for: Safety and Efficacy of VP-102, a Proprietary, Drug-Device Combination Product Containing Cantharidin, 0.7% (w/v), in Children and Adults With Molluscum Contagiosum: Two Phase 3 Randomized Clinical Trials
Source: PubMed Central journal article supplement — JAMA Dermatol. 2020 Sep 23;156(12):1–9. doi: 10.1001/jamadermatol.2020.3238 (PMC7512131; doi:10.1001/jamadermatol.2020.3238), 2020-09-23
Supplement: jamadermatol-e203238-s003.pdf [file jamadermatol-e203238-s003.pdf]

## **Data Sharing Statement**

Eichenfield. Safety and Efficacy of VP-102, a Proprietary, Drug-Device Combination Product Containing Cantharidin, 0.7% (w/v), in Children and Adults With Molluscum Contagiosum. *JAMA Dermatol*. Published September 23, 2020. 10.1001/jamadermatol.2020.3238

### **Data**

**Data available:** No
